1 **Comparative analysis of serological assays and sero-surveillance for SARS-**  
2 **CoV-2 exposure in US cattle**

3  
4 Santhamani Ramasamy<sup>#a,b</sup>, Meysoon Qureshi<sup>c#</sup>, Swastidipa Mukherjee<sup>a,b</sup>, Sonalika  
5 Mahajan<sup>d</sup>, Lindsey Cecelia LaBella<sup>a,b</sup>, Shubhada Chothe<sup>a,b</sup>, Padmaja Jakka<sup>c</sup>,  
6 Abhinay Gontu<sup>c</sup>, Sougat Misra<sup>a,b</sup>, Meera Surendran-Nair<sup>c</sup>, Ruth H. Nissly<sup>c</sup>, and  
7 Suresh V. Kuchipudi<sup>a,b\*</sup>

8  
9 *<sup>a</sup>Department of Infectious Diseases and Microbiology, University of Pittsburgh School of Public  
10 Health, Pittsburgh, PA, USA.*

11  
12 *<sup>b</sup>Center for Vaccine Research, University of Pittsburgh, Pittsburgh, Pennsylvania 15261, USA*

13  
14 *<sup>c</sup>Animal Diagnostic Laboratory, Department of Veterinary and Biomedical Sciences, The  
15 Pennsylvania State University, University Park, PA, USA*

16  
17 *<sup>d</sup>Division of Biological Standardization, ICAR-Indian Veterinary Research Institute, Bareilly,  
18 U.P., 243122, India*

19  
20  
21 \* Corresponding author: Suresh V. Kuchipudi. Email: [skuchipudi@pitt.edu](mailto:skuchipudi@pitt.edu)

22  
23 # These authors contributed equally  
24  
25  
26  
27  
28  
29  
30  
31  
32  
33  
34  
35  
36  
37  
38  
39

40 **Abstract**

41 Coronavirus disease-2019 (COVID-19) caused by severe acute respiratory syndrome coronavirus-2  
42 (SARS-CoV-2) continues to pose a significant threat to public health globally. Notably, SARS-CoV-2  
43 demonstrates a unique capacity to infect various non-human animal species, documented in captive and  
44 free-living animals. However, experimental studies revealed low susceptibility of domestic cattle (*Bos*  
45 *taurus*) to ancestral B.1 lineage SARS-CoV-2 infection, with limited viral replication and seroconversion.  
46 Despite the emergence of viral variants with potentially altered host tropism, recent experimental findings  
47 indicate greater permissiveness of cattle to SARS-CoV-2 Delta variant infection compared to other  
48 variants, though with limited seroconversion and no clear evidence of transmission. While some studies  
49 detected SARS-CoV-2 antibodies in cattle in Italy and Germany, there is no evidence of natural SARS-  
50 CoV-2 infection in cattle from the United States or elsewhere. Since serological tests have inherent  
51 problems of false positives and negatives, we conducted a comprehensive assessment of multiple  
52 serological assays on over 600 cattle serum samples, including pre-pandemic and pandemic cattle sera.  
53 We found that SARS-CoV-2 pseudovirus neutralization assays with a luciferase reporter system can  
54 produce false positive results, and care must be taken to interpret serological diagnosis using these assays.  
55 We found no serological evidence of natural SARS-CoV-2 infection or transmission among cattle in the  
56 USA. Hence, it is critical to develop more reliable serological assays tailored to accurately detect SARS-  
57 CoV-2 antibodies in cattle populations and rigorously evaluate diagnostic tools. This study underscores  
58 the importance of robust evaluation when employing serological assays for SARS-CoV-2 detection in  
59 cattle populations.

60 **Keywords:** SARS-CoV-2, cattle, spillover, antibodies, diagnostics, surveillance.

61

62

63

64

65

66

67

68

69

70

## 71 **Introduction**

72 Coronavirus disease-2019 (COVID-19), caused by the severe acute respiratory syndrome  
73 coronavirus-2 (SARS-CoV-2), will remain a threat to public health for the foreseeable future. A  
74 remarkable feature of SARS-CoV-2 is the ability to infect many non-human animal species, and  
75 natural SARS-CoV-2 infection of multiple captive and free-living animals has been  
76 documented[1-6]. Receptor binding and membrane fusion are critical steps for coronaviruses to  
77 cross the species barrier and establish efficient transmission pathways in new host species.  
78 SARS-CoV-2 spike (S) protein mediates virus entry and cell fusion through its direct  
79 interaction(s) with the cellular angiotensin-converting enzyme-2 (ACE2) receptor[7-9]. The  
80 ability of the S protein to bind to ACE-2 receptors is a crucial determinant of host susceptibility  
81 to SARS-CoV-2 infection.

82 Comparative and structural analysis of ACE2 receptors in vertebrates predicted that several  
83 mammals could be at high risk for SARS-CoV-2 infection[8-10]. Based on ACE2 binding to the  
84 receptor binding domain (RBD) of the S protein of wildtype B.1 lineage, domestic cattle (*Bos*  
85 *taurus*) have been predicted to be susceptible to SARS-CoV-2[2]. Subsequently, experimental  
86 studies showed low susceptibility of cattle to experimental ancestral B.1 lineage SARS-CoV-2  
87 infection with low levels of viral replication and limited seroconversion[11,12]. SARS-CoV-2  
88 continues to evolve, resulting in the emergence of mutational variants named after the Greek  
89 letters Alpha, Beta, Gamma, Delta and Omicron. The emergence of variants might result in  
90 altered host tropism. For example, laboratory mice that were resistant to wildtype SARS-CoV-2  
91 infection were found to be susceptible to alpha and other variants[13-17]. More recently,  
92 experimental co-infection of calves found that cattle are more permissive to infection with  
93 SARS-CoV-2 Delta than Omicron BA.2 and Wuhan-like isolates[18]. Further, the study also  
94 found limited seroconversion and no clear evidence of transmission to sentinel calves[18]. A  
95 study in 2022 reported detection of SARS-CoV-2 antibodies in lactating cows in Italy[19].  
96 Subsequently, a serological survey in Germany found antibody evidence of natural SARS-CoV-2  
97 exposure of cattle[20]. While these studies raise concerns about the potential spillover of recent  
98 SARS-CoV-2 variants into cattle, there is currently no evidence of natural SARS-CoV-2  
99 infection in cattle from the United States or elsewhere in the world.

100  
101 Given the experimental evidence indicating low susceptibility, limited seroconversion, and a lack  
102 of horizontal transmission of SARS-CoV-2 among cattle, coupled with concerns about the  
103 specificity of serological assays, it becomes imperative to thoroughly evaluate various  
104 serological methods for detecting SARS-CoV-2-specific antibodies in cattle. Consequently, we  
105 conducted a comprehensive assessment using multiple serological assays on over 600 cattle  
106 serum samples, including pre-pandemic and pandemic sera. We found no serological evidence of  
107 natural SARS-CoV-2 infection and transmission of SARS-CoV-2 in cattle in the USA. This  
108 study emphasizes the importance of rigorous evaluation when employing serological assays for  
109 SARS-CoV-2 detection in cattle populations.

## 110 111 **Materials and Methods**

112  
113 The following materials were obtained through BEI Resources, NIAID, NIH: human embryonic  
114 kidney cell line expressing human angiotensin-converting enzyme 2 (HEK-293T-hACE2) (NR-  
115 52511); SARS-Related Coronavirus 2 Wuhan-Hu-1 Spike-Pseudotyped Lentiviral Kit V2, (NR-

116 53816). Plasmids encoding spikes of SARS-CoV-2 variants Delta (Cat. No. 172320) and  
117 Omicron (Cat. No. 179907) were procured from Addgene, USA.

118

### 119 ***Serum samples***

120 Serum collected from cattle (n=549) from early 2022 to 2023 for the screening of bovine viral  
121 diseases at Animal Diagnostic Laboratory at Pennsylvania State University were analyzed in this  
122 study for the presence of SARS-CoV-2 antibodies. The age of cattle tested ranged from 2 months  
123 and older. Cattle sera (n=49) collected before 2020 were used as pre-pandemic negative controls.  
124 Additionally, hyperimmune sera (n=3) from cattle immunized with B.1 lineage RBD protein  
125 described in our earlier publication were included as positive controls in some assays. All animal  
126 care and sample collections were approved and performed in accordance with the guidelines of  
127 the Institutional Animal Care and Use Committee at Pennsylvania State University. The  
128 Pennsylvania State University Institutional Animal Care and Use Committee (IACUC protocol #  
129 PROTO202001506).

130

### 131 ***Production of SARS-CoV-2 pseudoviruses***

132 SARS-CoV-2 spike pseudoviruses were produced using the third-generation lentiviral plasmids  
133 as described elsewhere [21]. Lentiviral helper plasmid encoding Gag/pol, transfer plasmid  
134 encoding luciferase and ZsGreen, Tat and Rev and plasmid encoding spike of SARS-CoV-2  
135 variants Delta or Omicron were transfected in HEK 293T cells using Fugene6 reagent (Cat. No.  
136 E2691, Promega) following manufacturer's guidelines. The pseudovirus containing cell culture  
137 supernatants were collected after 48 hours of transfection, and filtered aliquots were stored at -  
138 80°C until use. The infectivity of SARS-CoV-2 pseudoviruses were determined using HEK-  
139 293T-hACE2 cells. Briefly, the HEK-293T-hACE2 cells were infected with 10-fold serial  
140 dilutions of pseudoviruses in 96 well clear bottom plate (Cat. No. 165306, ThermoScientific,  
141 USA). At 72 hours post infection, RLUs were measured (BioTek Synergy HTX Multi-Mode  
142 Microplate Reader, Agilent) following the addition of BrightGlo luciferase reagent (Cat. No.  
143 E2620, Promega). The dilution of the virus that showed  $\sim 10^4$  RLUs was used in the pseudovirus  
144 neutralization assay.

145

### 146 ***Detection of SARS-CoV-2 antibodies using pseudovirus neutralization assay (pVNT)***

147 We employed pVNT to test the presence of SARS-CoV-2 neutralizing antibodies in cattle sera  
148 using pseudoviruses containing spike proteins from Delta and Omicron SARS-CoV-2 variants of  
149 concern (VoCs). Briefly, the pseudoviruses equivalent of  $10^4$  RLUs were incubated with 1:30  
150 dilutions of heat inactivated sera for an hour at 37 °C. The pseudovirus/sera mixtures were  
151 inoculated into 96-well plates containing  $1.3 \times 10^4$  HEK-293T-hACE2 cells. The pseudovirus  
152 infectivity was determined at 72 hours post infection by quantifying the luciferase activity. The  
153 percentage neutralization of pseudoviruses was calculated by normalization to a virus-only  
154 control. Each serum was tested in a single well initially and the samples with percent  
155 neutralization of  $\geq 60\%$  were further tested in duplicates at three dilutions (1:30, 1:60, 1:120 and  
156 1:240). A percent neutralization of 60% was further tested in other assays. The results were  
157 analyzed using GraphPad Prism Software version 9 (San Diego, CA, USA).

158

### 159 ***Live Virus neutralization (VN) assay for SARS-CoV-2 antibodies***

160 VN assays to determine SARS-CoV-2 neutralizing antibody titers were performed as described  
161 earlier[22]. Briefly, Vero E6 cells were seeded onto 96-well plates and cultured for 18-24 hours

162 at 37°C with 5% CO<sub>2</sub>. Serum samples were heat inactivated, diluted 2-fold in triplicates using  
163 DMEM and mixed with 100TCID<sub>50</sub> of SARS-CoV-2 [hCoV-19/USA/PHC658/2021 (lineage  
164 B.1.617.2; Delta), and hCoV-19/USA/MD-HP20874/2021 (lineage B.1.1.529; Omicron)] and  
165 incubated at 37°C for one hour. The serum-virus mixtures were added to Vero E6 culture and  
166 incubated for 72 hours. Cells were observed for cytopathic effects under an inverted light  
167 microscope. The reciprocal of the highest dilution of serum showing no cytopathic effects in at  
168 least two out of three wells is considered as the neutralization titer of the serum.

169

#### 170 ***Live virus neutralization assay for Bovine coronavirus antibodies***

171 We performed a virus neutralization assay to detect bovine coronavirus specific antibodies  
172 following a previously reported procedure[23]. The two-fold serial dilutions of heat inactivated  
173 serum were mixed with 100 TCID<sub>50</sub> of bovine coronavirus strain Mebus and incubated for one  
174 hour at 37 °C with 5% CO<sub>2</sub>. The virus and serum mixture were added to MDBK cells, grown in a  
175 96-well microtiter plate, and incubated for 4 to 5 days at 37 °C with 5% CO<sub>2</sub>. The assay was  
176 performed in quadruplicate and endpoint neutralization titer was designated as the reciprocal of  
177 highest serum dilution, at which the virus infection is inhibited in all 3, or 2 of 3 wells as  
178 assessed by visual examination.

179

#### 180 ***SARS-CoV-2 Surrogate virus neutralization assay (sVNT)***

181 We used the widely accepted species-agnostic SARS-CoV-2 antibody detection kit, GenScript  
182 cPass™ technology-based neutralization assay[24] for testing the cattle serum samples. The  
183 sVNT is useful for the detection of SARS-CoV-2 specific antibodies in human and animal  
184 species. We tested pandemic and pre-pandemic serum samples in SARS-CoV-2 Delta and  
185 Omicron based sVNTs using manufacturer's instructions. Briefly, the serum samples were  
186 incubated with horse radish peroxidase (HRPO)-conjugated RBD (Delta or Omicron) (Cat. No.  
187 Z03614-20 and Cat. No. Z03730-20) and added to the wells coated with human ACE2 protein.  
188 Each serum was tested in single wells. The interaction of HRPO-conjugated RBD and ACE2  
189 were determined by measuring the absorbance values after adding the developing solution. The  
190 wells showing >30% of inhibition was determined as positive for the antibodies.

191

#### 192 ***Indirect ELISA assay for SARS-CoV-2 antibody detection***

193 We employed in-house developed indirect ELISA for the detection of antibodies in cattle serum  
194 samples [25]. Briefly, SARS-CoV-2 RBD antigens expressed in 293T cells were used to coat the  
195 96-well ELISA plates (Cat No. 44240421, Thermofisher, USA). 50µL (2µg/mL) of antigens  
196 were added on the wells and incubated at 4°C overnight. Plates were washed thrice with PBS  
197 containing 0.05% Tween20 and blocked using 200 µL/well of Stabilguard immunoassay buffer  
198 (SG01-1000, Surmodics, MN, USA). After washing, the plates were incubated with the serum  
199 samples diluted in Stabilguard buffer (1:50) for one hour at 37°C. Then 100µL of anti-bovine  
200 IgG peroxidase (Cat # A5295, Sigma-Aldrich, MO, USA) was added to the wells at 1:10,000  
201 dilutions. Plates were washed and incubated with 100µL per well of substrate containing  
202 3,3',5,5'-Tetramethylbenzidine dihydrochloride (Cat # T3405, Sigma-Aldrich, MO, USA) and  
203 hydrogen peroxide for 10 minutes. The reactions were terminated using 3N HCl and OD values  
204 were measured at 450nm using Cytation5 multi-mode reader. The samples showing OD values  
205 higher than the cut-off values were determined as positive for SARS-CoV-2 antibodies.

206

## 207 **Results**

208

209 ***Pseudovirus neutralization assay suggests SARS-CoV-2-specific antibodies in cattle serum of***  
210 ***varying quality***

211 In total 549 pandemic serum samples and 49 pre-pandemic serum samples were tested in SARS-  
212 CoV-2 pseudovirus neutralization assays (pVNT). We have previously demonstrated high cross-  
213 reactivity of ancestral B.1 RBD-specific hyperimmune serum against pseudovirus expressing  
214 pre-Omicron variant spike protein but low cross-reactivity against Omicron pseudovirus [26].  
215 Therefore, pVNT using Delta (pre-Omicron) and Omicron pseudoviruses were performed. Out  
216 of 549 pandemic samples, 56 serum samples showed >60% inhibition in pVNT using Delta, and  
217 44 serum samples had >60% inhibition in pVNT using Omicron pseudoviruses. The sixty  
218 percent inhibition indicates that the percent inhibition at serum dilution 1:30. However, none of  
219 the samples showed >90% inhibition at the 1:30 dilution of serum. Therefore, the 50%  
220 neutralization titer lies around 30 which is a very low or inconclusive titer. Note that 60%  
221 inhibition in pVNT is not a positive-negative cut-off in pVNT (**Figure 1**). Interestingly, two of  
222 the 49 pre-pandemic serum samples had >60% inhibition in pVNT using Delta spike. The quality  
223 of serum samples tested were variable, from pale and clear to red or dark brown with debris from  
224 blood. To rule out the effect of hemolysis on pVNT results, 33 pale and clear sera and 24  
225 hemolyzed sera were randomly selected for the comparison of percent inhibition in pVNT.  
226 Three-fold serial dilutions (1:30 to 1:240) of the samples were tested in pVNT. In pVNT, 33%  
227 and 9% of pale/clear and 20% and 16% of hemolyzed samples showed >60% inhibition of RLUs  
228 at 1:30 dilution with Delta and Omicron spike pseudoviruses, respectively. Hemolysis and serum  
229 quality did not significantly impact whether specimens were above or below 60% inhibition, per  
230 two-sided Fisher's exact test (delta  $p=0.56$ ; omicron  $p=0.13$ ).

231  
232 ***High percent inhibition in pVNT does not correspond to positivity in sVNT, indirect ELISA***  
233 ***and VN***

234 To confirm whether samples with pseudovirus inhibition indicated presence of SARS-CoV-2-  
235 specific antibody, we further tested the serum samples with >60% inhibition in pVNT using two  
236 additional assays measuring antibody binding to SARS-CoV-2 RBD. First, we tested sera in  
237 surrogate virus neutralization tests (sVNT) using RBD from Delta and Omicron [24,26,27]. Out  
238 of 90 samples (52 samples with >60% inhibition and 38 pre-pandemic samples), only two  
239 showed the percent inhibition above the cut-off in Delta sVNT. Of the 92 samples tested in  
240 Omicron sVNT, one sample showed the percent inhibition just above the cut-off (**Figure 2**). The  
241 cattle that showed 55% Delta sVNT inhibition had 71.5% Delta pVNT inhibition; on the other  
242 hand, the serum with 33% Delta sVNT inhibition had 4% inhibition Delta in pVNT. The serum  
243 with 31% Omicron sVNT inhibition showed 59.5% inhibition in Omicron pVNT.

244  
245 We previously validated an ancestral B.1 lineage RBD indirect ELISA assay with 100%  
246 sensitivity and specificity compared to a live virus neutralization assay[25]. When serum  
247 samples (n=88) that showed >60% inhibition in pVNT were tested in this assay, one sample  
248 showed absorbance above the determined cut-off and 87 samples had absorbance below the cut-  
249 off (**Figure 3**). Further, the samples that showed >30% inhibition in Delta (n=2) and Omicron  
250 (n=1) sVNT were negative in the indirect ELISA assay. The serum (n=1) that was positive in  
251 indirect ELISA had 45% inhibition in Delta pVNT. The serum samples with positivity in at least  
252 one of the serological assays are indicated in **Table 1**. The serum samples with >60% inhibition  
253 in pVNT and pre-pandemic samples were tested in live virus neutralization assays; none of the  
254 samples showed the neutralization at 1:20 dilution.

255

256 ***SARS-CoV-2 specific cattle antibodies are not cross-reactive to Bovine coronavirus***

257 Bovine coronavirus (BCoV), like SARS-CoV-2, is a member of the *Betacoronavirus* genus.  
258 BCoV is widespread in cattle populations, a host in which it can cause respiratory and enteric  
259 infections. Vaccination against BCoV is a common management strategy in the US. To  
260 understand if our observed SARS-CoV-2 pseudovirus inhibition could be due to cross-reactive  
261 bovine coronavirus antibodies, we tested a subset of cattle serum samples in BCoV live virus  
262 neutralization assays. We analyzed 3 hyperimmune sera raised in cattle against SARS-CoV-2  
263 Wuhan RBD, 5 serum samples that showed >60% inhibition in pVNT, 10 samples that showed  
264 <60% inhibition in pVNT, and 3 prepandemic serum samples (a serum showed >60% inhibition  
265 in Omicron pVNT). One hyperimmune serum, two pandemic serum samples with >60%  
266 inhibition, and four pandemic serum samples with <60% inhibition in pVNT showed  
267 neutralization of BCoV (**Table 2**). The majority of samples (60%) demonstrated no  
268 neutralization of BCoV irrespective of pVNT status. These results indicate that the percent  
269 inhibition in SARS-CoV-2 pVNT is not in correlation with BCoV neutralization. Indeed, SARS-  
270 CoV-2 Wuhan RBD hyperimmune sera that had > 90% inhibition in pVNT demonstrated no  
271 cross-neutralization of BCoV (**Table 2**).

272

273 **Discussion**

274

275 Cross-host transmission can occur with contact between viruses and potential new hosts [28].  
276 Potential sources of exposure of cattle to SARS-CoV-2 include infected humans and animals.  
277 Abundant, sustained, and protracted human-to-human transmission of SARS-CoV-2 promotes  
278 the risk of spillover to susceptible animal species. Natural infection and circulation of SARS-  
279 CoV-2 has been well-established in white-tailed deer, the most abundant large mammal species  
280 in the US[29-33]. Shared home ranges enhance the potential for spillover of SARS-CoV-2 from  
281 white-tailed-deer to cattle. It is well-established that bacterial and viral pathogens can be  
282 transmitted between deer and cattle due to the overlap of deer home ranges with cattle pastures.  
283 *Mycobacterium tuberculosis* and bovine viral diarrhoea viruses are thought to persist through  
284 bidirectional transmission between cattle and deer[34,35], and transmission between species has  
285 been documented for other non-vector-borne pathogens including hepatitis E virus[36] and  
286 bovine coronavirus[37]. Transmission of SARS-CoV-2 within the human population occurs  
287 through multiple methods, including aerosols, droplets, and fomites, with spreading possibly  
288 through either direct or indirect contacts[38,39]. The potential for transmission of SARS-CoV-2  
289 to livestock from wildlife through similar routes is high.

290 Earlier studies suggested cattle are poorly permissive to infection with SARS-CoV-2[11,12].  
291 Further, a recent study suggested that cattle are more permissive to infection with SARS-CoV-2  
292 Delta than Omicron BA.2[18]. Further, the study also found limited seroconversion and no clear  
293 evidence of transmission to sentinel calves[18]. Serological studies from Italy[19] and  
294 Germany[20] reported antibody evidence of natural SARS-CoV-2 exposure of cattle. Serological  
295 assays show various sensitivity ranges[40,41], and false-positive serology test results have been  
296 reported in COVID-19[42,43]; therefore, it is crucial to compare various serological testing  
297 methods in a given host species for serological determination of SARS-CoV-2 infection.

298

299 We investigated antibody presence in cattle using an easily adaptable pseudovirus neutralization  
300 assay system allowing detection of antibodies reactive to ancient and contemporary SARS-CoV-

301 2 spike antigens. With stringent testing using multiple serological and neutralization assays, all  
302 the US cattle serum samples (n=598) were negative for SARS-CoV-2 antibodies. Notably, one  
303 serum sample showed borderline positive results in both pVNT and sVNT using Omicron  
304 lineage antigen. However, the sample was negative in SARS-CoV-2 live virus neutralization  
305 assay.

306  
307 Although pVNTs yield comparable neutralization titer as that of live virus neutralization assays  
308 for detecting the SARS-CoV-2 antibodies[44-46], their use as a diagnostic tool could be limited  
309 due to the highly sensitive luciferase reporter system. pVNTs are widely used to determine the  
310 variant specific neutralization titer and generate antigen cartography to assess the relationship  
311 between the variants and serum antibodies[26]. We found that high percent inhibition of  
312 pseudovirus in a single serum dilution did not predict antibody detection ability using other  
313 methods, including a validated indirect ELISA. When pVNTs are repurposed to use for diagnosis  
314 using a single serum dilution, several factors may contribute to false positive results. In general,  
315 when the serum has a good titer of neutralizing antibodies to SARS-CoV-2, the percent  
316 inhibition in pVNTs are ~100% in several two-fold serial dilutions, i.e. may be up to 1:120  
317 dilution of serum samples, that we have observed in cat [26] and white-tailed deer[27].  
318 Meanwhile, the cattle serum samples that were tested in pVNT showed inhibition values from 0-  
319 80% and a few samples had >80% inhibition at 1:30 dilution. Here, the reduction in pseudovirus  
320 readout could be due to cytotoxicity at 1:30 dilution, as the reduced cell growth could result in  
321 less luminescence. A way to prevent false positive results due to less cell growth is by  
322 quantitating protein concentrations in the replicate wells.

323 The GenScript c-Pass sVNTs are widely used for serological surveillance in humans that employ  
324 the 30% inhibition as a positive-negative cut-off[24]. SARS-CoV-2 Delta-RBD based sVNT  
325 showed 99.93% specificity and 95–100% sensitivity detecting the antibodies in humans[24].  
326 Being a species agnostic test, sVNT has been evaluated for the antibody detection in different  
327 species including white-tailed deer, cat, hamster[47]. We have used 30% cut-off for cattle sera  
328 analysis; however, a recent study recommended the cut-off of 43% and 51% using limited  
329 numbers of pre-pandemic cattle and horse sera suggesting the cut-off of 30% may result in false  
330 positives[48]. Therefore, the Delta and Omicron-sVNT positive samples (n=3) determined in this  
331 study could be due to incorrect cut-off. This is further explained by two of the pre-pandemic  
332 samples showing more than 30% inhibition in Delta sVNT. In the in-house indirect ELISA, we  
333 have established the cut-off (mean absorbance+5 standard deviation) using 40 pre-pandemic  
334 serum samples[25]; however, this cut-off was not evaluated with the clinical samples from  
335 natural SARS-CoV-2 infection due to lack of positive samples. Therefore, we assume the  
336 possibility of false-positive results in the indirect ELISA and tested all the samples with >60%  
337 inhibition in pVNT using live virus neutralization assay. However, none of the serum samples  
338 with >60% inhibition in Delta and Omicron-pVNTs showed the neutralization of SARS-CoV-2  
339 in live virus neutralization assays. Although, live virus neutralization assays are gold-standard  
340 comparative tests for antibody diagnostics; it requires biosafety level-3 containment facility  
341 (BSL-3)[49]. In most cases, BSL-3 laboratories are shared facilities for multiple users and  
342 requires use of expensive personnel protective equipment; therefore, it is not feasible to test large  
343 number of samples for the diagnostic purposes using SARS-CoV-2 live virus neutralization  
344 assays.

345 The list of susceptible animal species to SARS-CoV-2 continues to grow. Computational  
346 predictions indicate 17 bat species, and 76 rodent species have high probabilities of zoonotic



347 capacity for SARS-CoV-2 infection[50]. Given the diversity of non-human mammalian species  
348 susceptible to SARS-CoV-2, it is possible that variants capable of infecting cattle may emerge.  
349 However, surveillance efforts in domestic and wild animal species remain inadequate to assess  
350 the spill over into animals. Our study underscores the necessity for cautious interpretation of  
351 serological diagnoses derived from these assays. Consequently, there is an urgent need to  
352 advance the development of more dependable serological assays specifically tailored to detect  
353 SARS-CoV-2 antibodies for high-risk animal populations. This emphasizes the critical  
354 importance of rigorous evaluation protocols when implementing serological assays for SARS-  
355 CoV-2 detection, thereby enhancing our ability to monitor and manage potential zoonotic  
356 transmission events.

357 **Acknowledgments:** The study is funded by the USDA-NIFA grant (# 2020-67015-32175)  
358 (MSN and SVK), Endowed chair funds of the Penn State Huck Institutes of the Life Sciences  
359 (SVK), USDA-NIFA grant (#2023-70432-41334) (SVK and SR) and grant from Commonwealth  
360 of Pennsylvania- Department of Agriculture (SVK and SR). The authors thank Rhiannon Barry,  
361 Michele Yon, Erik Nguyen, and Manju Yadhav of the Animal Diagnostic Laboratory at Penn  
362 State, for their help in procuring the cattle serum samples.

363

364 **Declaration of interest statement:** The authors declare no conflict of interest.

365

366

367

368

369

370

371

372

373

374

375

376

377

378

379

380

381

382

383

384

385

386

387

388

389

390

391

392

393

394

395

396  
397  
398  
399

## References

- 400  
401
- 402 1. Meekins DA, Gaudreault NN, Richt JA. Natural and Experimental SARS-CoV-2  
403 Infection in Domestic and Wild Animals. *Viruses*. 2021 Oct 4;13(10):1993.
  - 404 2. Damas J, Hughes GM, Keough KC, et al. Broad host range of SARS-CoV-2 predicted by  
405 comparative and structural analysis of ACE2 in vertebrates. *Proc Natl Acad Sci U S A*.  
406 2020 Sep 8;117(36):22311-22322.
  - 407 3. Weiss SR, Navas-Martin S. Coronavirus pathogenesis and the emerging pathogen severe  
408 acute respiratory syndrome coronavirus. *Microbiol Mol Biol Rev*. 2005;69(4):635-664.
  - 409 4. Oreshkova N, Molenaar RJ, Vreman S, et al. SARS-CoV-2 infection in farmed minks,  
410 the Netherlands, April and May 2020. *Euro Surveill*. 2020 Jun;25(23).
  - 411 5. Hobbs EC, Reid TJ. Animals and SARS-CoV-2: Species susceptibility and viral  
412 transmission in experimental and natural conditions, and the potential implications for  
413 community transmission. *Transbound Emerg Dis*. 2021 Jul;68(4):1850-1867.
  - 414 6. Fritz M, Rosolen B, Krafft E, et al. High prevalence of SARS-CoV-2 antibodies in pets  
415 from COVID-19+ households. *One Health*. 2021 Jun;11:100192.
  - 416 7. Damas J, Hughes GM, Keough KC, et al. Broad host range of SARS-CoV-2 predicted by  
417 comparative and structural analysis of ACE2 in vertebrates. *Proceedings of the National  
418 Academy of Sciences of the United States of America*. 2020;117:22311-22322.
  - 419 8. Liu Y, Hu G, Wang Y, et al. Functional and genetic analysis of viral receptor ACE2  
420 orthologs reveals a broad potential host range of SARS-CoV-2. *Proceedings of the  
421 National Academy of Sciences of the United States of America*. 2021;118.
  - 422 9. Ren W, Zhu Y, Wang Y, et al. Comparative analysis reveals the species-specific genetic  
423 determinants of ACE2 required for SARS-CoV-2 entry. *PLoS Pathogens*. 2021;17.
  - 424 10. Zhao X, Chen D, Szabla R, et al. Broad and Differential Animal Angiotensin-Converting  
425 Enzyme 2 Receptor Usage by SARS-CoV-2. *Journal of Virology*. 2020;94.
  - 426 11. Ulrich L, Wernike K, Hoffmann D, et al. Experimental Infection of Cattle with SARS-  
427 CoV-2. *Emerg Infect Dis*. 2020 Dec;26(12):2979-2981.
  - 428 12. Falkenberg S, Buckley A, Laverack M, et al. Experimental Inoculation of Young Calves  
429 with SARS-CoV-2. *Viruses*. 2021 Mar 9;13(3).
  - 430 13. Shuai H, Chan JF-W, Yuen TT-T, et al. Emerging SARS-CoV-2 variants expand species  
431 tropism to murines. *eBioMedicine*. 2021;73.
  - 432 14. Stolp B, Stern M, Ambiel I, et al. SARS-CoV-2 variants of concern display enhanced  
433 intrinsic pathogenic properties and expanded organ tropism in mouse models. *Cell Rep*.  
434 2022 Feb 15;38(7):110387.
  - 435 15. Kant R, Kareinen L, Smura T, et al. Common Laboratory Mice Are Susceptible to  
436 Infection with the SARS-CoV-2 Beta Variant. *Viruses*. 2021 Nov 11;13(11).
  - 437 16. Pan T, Chen R, He X, et al. Infection of wild-type mice by SARS-CoV-2 B.1.351 variant  
438 indicates a possible novel cross-species transmission route. *Signal Transduction and  
439 Targeted Therapy*. 2021 2021/12/14;6(1):420.
  - 440 17. Chen Q, Huang X-Y, Liu Y, et al. Comparative characterization of SARS-CoV-2 variants  
441 of concern and mouse-adapted strains in mice. *Journal of Medical Virology*.  
442 2022;94(7):3223-3232.

- 443 18. Cool K, Gaudreault NN, Trujillo JD, et al. Experimental co-infection of calves with  
444 SARS-CoV-2 Delta and Omicron variants of concern. *Emerg Microbes Infect.* 2024  
445 Dec;13(1):2281356.
- 446 19. Fiorito F, Iovane V, Pagnini U, et al. First Description of Serological Evidence for  
447 SARS-CoV-2 in Lactating Cows. *Animals (Basel)*. 2022 Jun 4;12(11).
- 448 20. Wernike K, Bottcher J, Amelung S, et al. Antibodies against SARS-CoV-2 Suggestive of  
449 Single Events of Spillover to Cattle, Germany. *Emerg Infect Dis.* 2022 Sep;28(9):1916-  
450 1918.
- 451 21. Crawford KHD, Eguia R, Dingens AS, et al. Protocol and Reagents for Pseudotyping  
452 Lentiviral Particles with SARS-CoV-2 Spike Protein for Neutralization Assays. *Viruses*.  
453 2020 May 6;12(5).
- 454 22. Sayedahmed EE, Araujo MV, Silva-Pereira TT, et al. Impact of an autophagy-inducing  
455 peptide on immunogenicity and protection efficacy of an adenovirus-vectored SARS-  
456 CoV-2 vaccine. *Mol Ther Methods Clin Dev.* 2023 Sep 14;30:194-207.
- 457 23. Fulton RW, Step DL, Wahrmund J, et al. Bovine coronavirus (BCV) infections in  
458 transported commingled beef cattle and sole-source ranch calves. *Can J Vet Res.* 2011  
459 Jul;75(3):191-9.
- 460 24. Tan CW, Chia WN, Qin X, et al. A SARS-CoV-2 surrogate virus neutralization test  
461 based on antibody-mediated blockage of ACE2-spike protein-protein interaction. *Nat*  
462 *Biotechnol.* 2020 Sep;38(9):1073-1078.
- 463 25. Gontu A, Marlin EA, Ramasamy S, et al. Development and Validation of Indirect  
464 Enzyme-Linked Immunosorbent Assays for Detecting Antibodies to SARS-CoV-2 in  
465 Cattle, Swine, and Chicken. *Viruses*. 2022 Jun 22;14(7).
- 466 26. Ramasamy S, Gontu A, Neerukonda S, et al. SARS-CoV-2 Prevalence and Variant  
467 Surveillance among Cats in Pittsburgh, Pennsylvania, USA. *Viruses*. 2023 Jun 30;15(7).
- 468 27. Vandegrift KJ, Yon M, Surendran Nair M, et al. SARS-CoV-2 Omicron (B.1.1.529)  
469 Infection of Wild White-Tailed Deer in New York City. *Viruses*. 2022 Dec 12;14(12).
- 470 28. Munnink BBO, Sikkema RS, Nieuwenhuijse DF, et al. Transmission of SARS-CoV-2 on  
471 mink farms between humans and mink and back to humans. *Science (New York, NY)*.  
472 2021;371:172-177.
- 473 29. Kuchipudi SV, Surendran-Nair M, Ruden RM, et al. Multiple spillovers from humans  
474 and onward transmission of SARS-CoV-2 in white-tailed deer. *Proceedings of the*  
475 *National Academy of Sciences of the United States of America.* 2022;119.
- 476 30. Marques AD, Sherrill-Mix S, Everett JK, et al. Multiple Introductions of SARS-CoV-2  
477 Alpha and Delta Variants into White-Tailed Deer in Pennsylvania. *mBio*. 2022.
- 478 31. Hale VL, Dennis PM, McBride DS, et al. SARS-CoV-2 infection in free-ranging white-  
479 tailed deer. *Nature* 2022 602:7897. 2021;602:481-486.
- 480 32. Pickering B, Lung O, Maguire F, et al. Divergent SARS-CoV-2 variant emerges in white-  
481 tailed deer with deer-to-human transmission. *Nat Microbiol.* 2022 Dec;7(12):2011-2024.
- 482 33. Kotwa JD, Lobb B, Masse A, et al. Genomic and transcriptomic characterization of delta  
483 SARS-CoV-2 infection in free-ranging white-tailed deer (*Odocoileus virginianus*).  
484 *iScience.* 2023 Nov 17;26(11):108319.
- 485 34. Kirchgessner MS, Dubovi EJ, Whipps CM. Spatial point pattern analyses of Bovine viral  
486 diarrhea virus infection in domestic livestock herds and concomitant seroprevalence in  
487 wild white-tailed deer (*Odocoileus virginianus*) in New York State, USA. *Journal of*  
488 *Veterinary Diagnostic Investigation.* 2013;25:226-233.

- 489 35. VerCauteren KC, Lavelle MJ, Campa H. Persistent spillback of bovine tuberculosis from  
490 white-tailed deer to cattle in Michigan, USA: Status, Strategies, and Needs. *Frontiers in*  
491 *Veterinary Science*. 2018;5:301.
- 492 36. Medrano-Galarza C, Gibbons J, Wagner S, et al. Behavioral changes in dairy cows with  
493 mastitis. *Journal of dairy science*. 2012;95:6994-7002.
- 494 37. Tsunemitsu H, El-Kanawati ZR, Smith DR, et al. Isolation of coronaviruses antigenically  
495 indistinguishable from bovine coronavirus from wild ruminants with diarrhea. *Journal of*  
496 *Clinical Microbiology*. 1995;33:3264.
- 497 38. Rogers GS, Advani H, Ackerman AB. A combined variant of Spitz's nevi. How to  
498 differentiate them from malignant melanomas. *The American Journal of*  
499 *dermatopathology*. 1985;7 Suppl:61-78.
- 500 39. Tang JW, Bahnfleth WP, Bluysen PM, et al. Dismantling myths on the airborne  
501 transmission of severe acute respiratory syndrome coronavirus-2 (SARS-CoV-2). *Journal*  
502 *of Hospital Infection*. 2021;110:89-96.
- 503 40. Swadzba J, Bednarczyk M, Anyszek T, et al. The real life performance of 7 automated  
504 anti-SARS-CoV-2 IgG and IgM/IgA immunoassays. *Pract Lab Med*. 2021  
505 May;25:e00212.
- 506 41. Cota G, Freire ML, de Souza CS, et al. Diagnostic performance of commercially  
507 available COVID-19 serology tests in Brazil. *Int J Infect Dis*. 2020 Dec;101:382-390.
- 508 42. Boukli N, Le Mene M, Schnuriger A, et al. High Incidence of False-Positive Results in  
509 Patients with Acute Infections Other than COVID-19 by the Liaison SARS-CoV-2  
510 Commercial Chemiluminescent Microparticle Immunoassay for Detection of IgG Anti-  
511 SARS-CoV-2 Antibodies. *J Clin Microbiol*. 2020 Oct 21;58(11).
- 512 43. To KK, Chua GT, Kwok KL, et al. False-positive SARS-CoV-2 serology in 3 children  
513 with Kawasaki disease. *Diagn Microbiol Infect Dis*. 2020 Nov;98(3):115141.
- 514 44. D'Apice L, Trovato M, Gramigna G, et al. Comparative analysis of the neutralizing  
515 activity against SARS-CoV-2 Wuhan-Hu-1 strain and variants of concern: Performance  
516 evaluation of a pseudovirus-based neutralization assay. *Front Immunol*. 2022;13:981693.
- 517 45. Cantoni D, Wilkie C, Bentley EM, et al. Correlation between pseudotyped virus and  
518 authentic virus neutralisation assays, a systematic review and meta-analysis of the  
519 literature. *Front Immunol*. 2023;14:1184362.
- 520 46. Sholukh AM, Fiore-Gartland A, Ford ES, et al. Evaluation of Cell-Based and Surrogate  
521 SARS-CoV-2 Neutralization Assays. *J Clin Microbiol*. 2021 Sep 20;59(10):e0052721.
- 522 47. Embregts CWE, Verstrepen B, Langermans JAM, et al. Evaluation of a multi-species  
523 SARS-CoV-2 surrogate virus neutralization test. *One Health*. 2021 Dec;13:100313.
- 524 48. Huttl J, Reitt K, Meli ML, et al. Serological and Molecular Investigation of SARS-CoV-2  
525 in Horses and Cattle in Switzerland from 2020 to 2022. *Viruses*. 2024 Jan 31;16(2).
- 526 49. Gontu A, Srinivasan S, Salazar E, et al. Limited window for donation of convalescent  
527 plasma with high live-virus neutralizing antibody titers for COVID-19 immunotherapy.  
528 *Commun Biol*. 2021 Feb 24;4(1):267.
- 529 50. Fischhoff IR, Castellanos AA, Rodrigues J, et al. Predicting the zoonotic capacity of  
530 mammals to transmit SARS-CoV-2. *Proc Biol Sci*. 2021 Nov 24;288(1963):20211651.  
531  
532  
533  
534

535  
536  
537  
538  
539  
540  
541  
542  
543

**Table 1.** Determination of Bovine coronavirus neutralization titer of pre-pandemic (n=2), pandemic (n=15) and hyperimmune (n=3) serum samples.

| Type of samples      | BCoV neutralization      |           |            |                                    |
|----------------------|--------------------------|-----------|------------|------------------------------------|
|                      | Number of samples tested | Positives | % positive | Neutralization titer               |
| RBD hyperimmune      | 3                        | 1         | 33%        | 1280, <20, <20                     |
| >60% inhibition      | 5                        | 2         | 40%        | 160, 320, other samples <20.       |
| <60% inhibition      | 10                       | 4         | 40%        | 20, 80, 20, 20, other samples <20. |
| Pre-pandemic samples | 2                        | 0         | 0%         | All the samples <20%               |

544  
545  
546  
547  
548  
549  
550  
551  
552  
553  
554  
555  
556  
557  
558  
559  
560  
561  
562  
563  
564  
565  
566  
567  
568  
569  
570  
571

572  
573  
574  
575  
576  
577  
578  
579  
580

**Table 2:** Results demonstrating "positivity" in at least one SARS-CoV-2 serological assay.

| Serum id    | Delta pVNT | Omicron pVNT | Delta sVNT | Omicron sVNT | Indirect ELISA |
|-------------|------------|--------------|------------|--------------|----------------|
| P2231751-2  | 71%        | 84%          | 52%        | Neg          | Neg            |
| P2002039-2C | 4%         | 20%          | 33%        | Neg          | Neg            |
| P2214655-57 | 49%        | 59.5%        | Neg        | 31%          | Neg            |
|             | 58.3%      | 64%          | Not done   | Neg          | Pos            |

581  
582  
583  
584  
585  
586  
587  
588  
589  
590  
591  
592  
593  
594  
595  
596  
597  
598  
599  
600  
601  
602  
603  
604  
605  
606  
607  
608  
609

610  
611

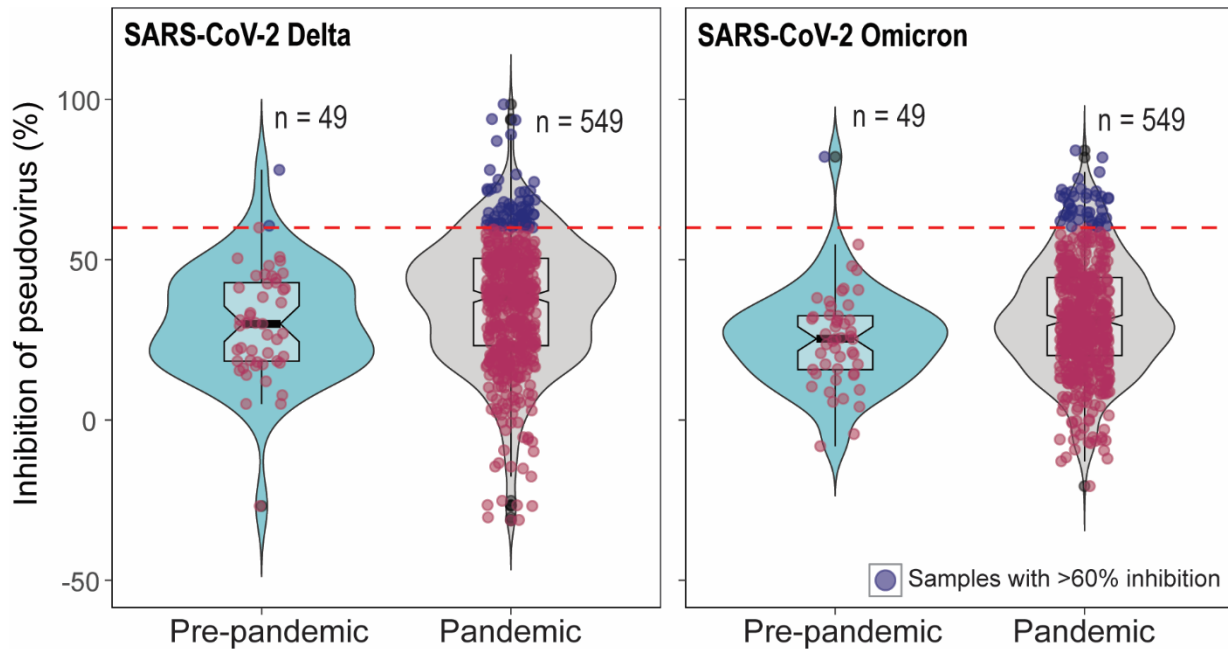

612  
613  
614  
615  
616  
617  
618  
619  
620

**Figure 1:** Distribution of percent inhibition of SARS-CoV-2 Delta and Omicron spike pseudoviruses by cattle serum samples in pVNT. In the pVNT, 549 pandemic and 49 pre-pandemic serum samples were tested. The dotted line indicates the 60% inhibition. 69 pandemic and two pre-pandemic serum showed >60% inhibition in SARS-CoV-2 Delta pVNT and 44 pandemic serum samples and one pre-pandemic serum showed >60% inhibition in Omicron pVNT.

621  
622  
623  
624  
625  
626  
627  
628  
629  
630  
631  
632  
633  
634  
635  
636  
637  
638  
639  
640  
641

642  
643  
644  
645

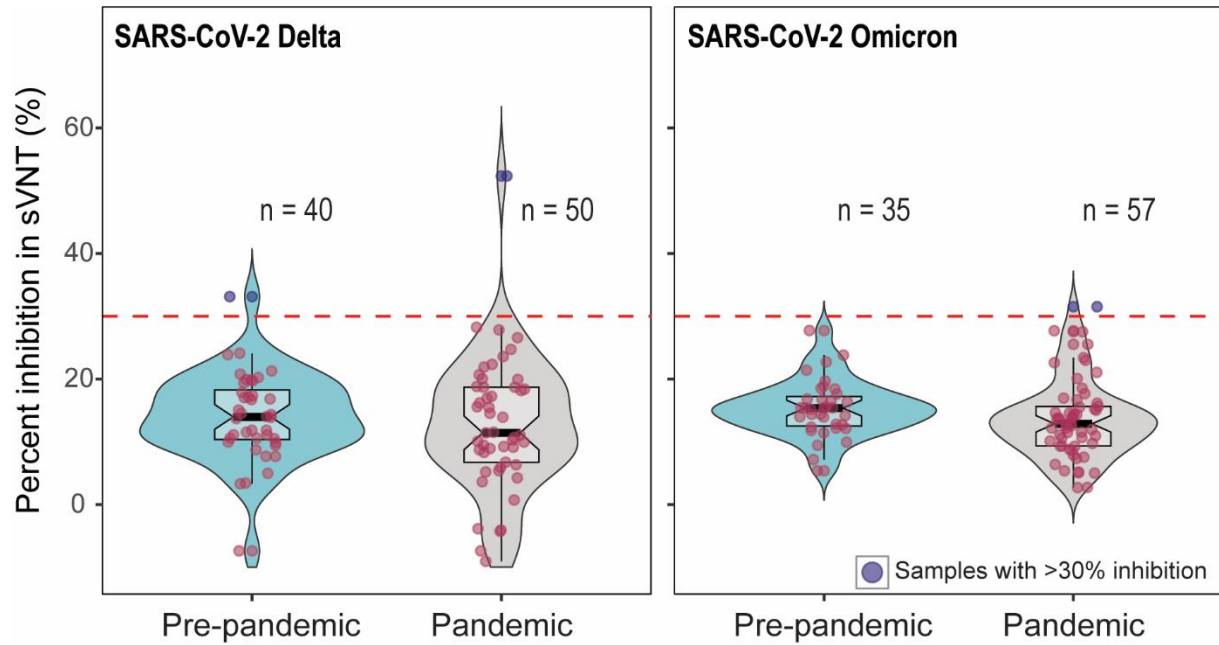

646  
647  
648  
649  
650  
651  
652  
653  
654  
655  
656  
657  
658  
659  
660

**Figure 2.** The percent inhibition of cattle sera in Delta (a) and Omicron (b) -RBD based sVNT. The positive-negative threshold stated by the manufacturer is 30%. Two out of 90 and one out of 92 serum samples showing >30% inhibition in Delta and Omicron sVNT, respectively.



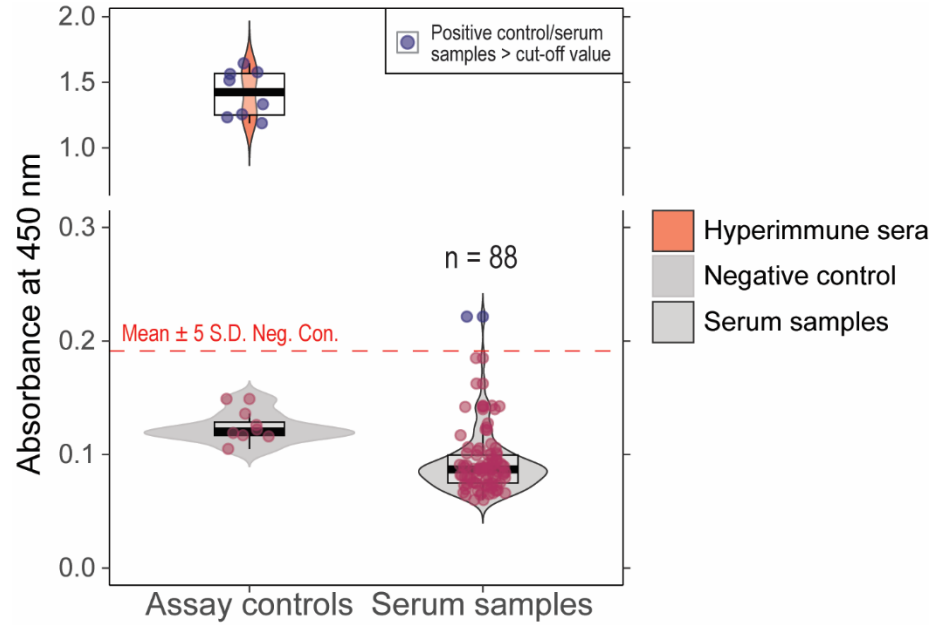

661  
662

663 **Figure 3.** Absorbance values ( $A_{450}$  nm) for cattle serum samples tested in in-house developed  
664 indirect ELISA. The cut-off for the positive vs. negative samples is Mean+5S.D. One of the  
665 serum samples had absorbance values higher than the cut-off.

666  
667  
668  
669  
670  
671  
672  
673  
674  
675  
676  
677  
678  
679  
680  
681  
682  
683  
684  
685  
686  
687  
688  
689  
690  
691  
692  
693
